# Supplementary material
Source: publisher site journal article supplement (https://www.spandidos-publications.com/7628/downloadSupplementary)
Supplement: Supplementary file 1 [file downloadSupplementary]

## Sheet: Sheet1
Table SIV. Multivariate analyses of prognosis using the stepwise method.
A, Recurrence-free survival
Subsets	Groups	Univariate				Multivariate				Multivariate				Multivariate				Multivariate				Multivariate				Multivariate				Multivariate				Multivariate				Multivariate				Multivariate				Multivariate
		HR	P-value	95%CI		HR	P-value	95%CI		HR	P-value	95%CI		HR	P-value	95%CI		HR	P-value	95%CI		HR	P-value	95%CI		HR	P-value	95%CI		HR	P-value	95%CI		HR	P-value	95%CI		HR	P-value	95%CI		HR	P-value	95%CI		HR	P-value	95%CI
Age, years	(>77 vs. ≤77)	0.985138	0.9674	0.47432	2.02253	0.545732	0.0798	0.267798	1.07367	0.545497	0.0783	0.268535	1.0702	0.547135	0.0786	0.270615	1.07072	0.545051	0.0761	0.270671	1.0652	0.544617	0.0755	0.270559	1.06392	0.543339	0.0737	0.270488	1.05974	0.54131	0.0725	0.269278	1.05707	0.530543	0.0648	0.263682	1.03937	0.51684	0.0546	0.256853	1.0131	0.550978	0.0742	0.281037	1.05998	0.572807	0.0953	0.292114	1.10215
Sex	(Male vs. Female)	2.20381	0.081	0.914999	6.53923	0.921027	0.9239	0.165053	4.86189	0.92259	0.9247	0.168014	4.78239
Smoking	(Ever vs. Never)	2.63732	0.0297	1.09231	7.83942	3.15338	0.1494	0.676076	16.6362	3.14781	0.1447	0.688219	16.2563	2.98043	0.0441	1.02817	10.0221	3.54755	0.0151	1.26366	11.7201	3.6078	0.0107	1.32816	11.6591	3.63565	0.01	1.34027	11.747	3.65353	0.0102	1.33936	11.8502	3.95485	0.0043	1.50172	12.5406	3.34808	0.0074	1.35151	10.1367	3.62375	0.0035	1.48262	10.8756	4.1357	0.0007	1.74062	12.209
PS	(1 vs. 0)	1.13034	0.7538	0.506894	2.36274	0.994409	0.9891	0.436421	2.22011
Histology	(non-Ad vs. Ad)	1.82813	0.1047	0.879008	3.75866	2.45004	0.0287	1.09646	5.6891	2.4469	0.0262	1.11134	5.52413	2.45179	0.0258	1.11387	5.52893	2.24109	0.0475	1.00877	5.13674	2.24334	0.0475	1.00875	5.14425	2.1786	0.0526	0.991247	4.97733	2.07508	0.0557	0.982518	4.57266	2.00052	0.0662	0.955248	4.37363	1.70759	0.116	0.875603	3.36172	1.60655	0.1544	0.83535	3.10149
pStage	(II/IIIA vs. I)	4.62048	<0.0001	2.20574	10.3221	3.35977	0.0006	1.68949	6.81286	3.3594	0.0006	1.6897	6.81089	3.34808	0.0005	1.68991	6.76046	3.0955	0.0013	1.55618	6.29425	3.08919	0.0013	1.55401	6.27894	3.09166	0.0013	1.55752	6.2748	3.02084	0.0013	1.53722	6.10777	3.22096	0.0005	1.66693	6.34129	3.15854	0.0007	1.63024	6.24961	2.91466	0.0011	1.53258	5.63428	3.11682	0.0006	1.63577	6.01806
EGFR mutation	(Wild type* vs. Mutant)	1.25119	0.5812	0.579439	2.99592	0.610358	0.3724	0.209261	1.83763	0.611144	0.3668	0.213259	1.81249	0.604518	0.3419	0.214898	1.72444	0.596561	0.317	0.216675	1.65391	0.604797	0.3204	0.22341	1.64308	0.581341	0.2764	0.218487	1.55589	0.564654	0.2477	0.214461	1.49988	0.62652	0.3153	0.252396	1.57928
TP expression*	(<0.525 vs. ≥0.525)	0.7	0.25	0.37	1.29	0.73293	0.4138	0.346446	1.55146	0.733074	0.4138	0.347016	1.55142	0.736222	0.4169	0.350718	1.55005	0.682456	0.3195	0.321767	1.45442	0.680159	0.3141	0.321189	1.44687	0.632328	0.1681	0.322029	1.21214	0.622199	0.1505	0.31828	1.1867	0.602813	0.1196	0.310694	1.13913	0.603157	0.119	0.311395	1.13775	0.629768	0.1477	0.329516	1.17686	0.644031	0.1651	0.338748	1.19781
TS expression	(<0.766 vs. ≥0.766)	0.77	0.41	0.41	1.43	0.815528	0.591	0.387388	1.72699	0.815079	0.5875	0.388392	1.715	0.818461	0.5927	0.391544	1.71315	0.951601	0.8922	0.462398	1.95989
DPD expression	(<5.825 vs. ≥5.825)	1.58	0.15	0.85	3.02	0.839648	0.6636	0.382968	1.86503	0.83918	0.6605	0.383413	1.84824	0.835675	0.6512	0.383797	1.8345	0.828266	0.6404	0.374909	1.8375	0.830281	0.6449	0.375281	1.84106	0.85832	0.6993	0.39411	1.87422
OPRT expression**	(<0.312 vs. ≥0.312)	1.04	0.89	0.56	1.94	1.15949	0.6968	0.550546	2.48199	1.16164	0.6728	0.580302	2.36448	1.16333	0.6697	0.581252	2.36648
ERCC1 expression	(<45.721 vs. ≥45.721)	0.99	0.96	0.53	1.83	1.18002	0.6686	0.554079	2.55632	1.17869	0.6642	0.558364	2.48108	1.17726	0.6666	0.557873	2.47898	1.18264	0.6651	0.55203	2.53878	1.17101	0.6783	0.554288	2.48315
EGFR expression*	(<0.735 vs. ≥0.735)	2.03	0.0264	1.09	3.92	1.38202	0.4743	0.566747	3.37258	1.3821	0.4741	0.566826	3.37253	1.37904	0.4766	0.566246	3.36302	1.34514	0.4866	0.584872	3.16219	1.31352	0.4811	0.621235	2.90179	1.28654	0.5113	0.612683	2.81748	1.27662	0.5242	0.608241	2.79283
Arm	(A vs. B)	1.2482	0.5444	0.607639	2.59382	1.46	0.28	0.74	2.96	1.45932	0.263	0.753815	2.88603	1.45501	0.2648	0.753661	2.86723	1.37677	0.3456	0.71	2.72938	1.37576	0.347	0.70924	2.72904	1.36626	0.3576	0.704459	2.71032	1.39843	0.3151	0.72853	2.74688	1.43174	0.2792	0.748855	2.80168	1.47051	0.2461	0.767687	2.88086
B, Overall survival
Subsets	Groups	Univariate				Multivariate				Multivariate				Multivariate				Multivariate				Multivariate				Multivariate				Multivariate				Multivariate				Multivariate				Multivariate				Multivariate
		HR	P-value	95%CI		HR	P-value	95%CI		HR	P-value	95%CI		HR	P-value	95%CI		HR	P-value	95%CI		HR	P-value	95%CI		HR	P-value	95%CI		HR	P-value	95%CI		HR	P-value	95%CI		HR	P-value	95%CI		HR	P-value	95%CI		HR	P-value	95%CI
Age, years	(>77 vs. ≤77)	0.975828	0.947	0.467817	2.01039	0.547112	0.155	0.227052	1.25256	0.538594	0.1416	0.226042	1.22672	0.541922	0.1454	0.227455	1.23349	0.561194	0.1572	0.245678	1.24894	0.560334	0.156	0.245308	1.24697	0.547458	0.1394	0.240832	1.21712	0.536836	0.1246	0.237095	1.18737	0.581909	0.1706	0.263053	1.26301	0.587342	0.1779	0.265516	1.27449	0.640069	0.242	0.299067	1.3547	0.669854	0.2944	0.312265	1.4198
Sex	(Male vs. Female)	13.5489	<0.0001	2.89826	241.389	2.2164	0.5867	0.154162	68.9263	2.06938	0.6124	0.155933	61.7475	1.87237	0.6578	0.148861	53.9165	1.76884	0.6871	0.14377	51.0034
Smoking	(Ever vs. Never)	16.0034	<0.0001	3.42175	285.156	8.09487	0.0784	0.826666	241.125	8.16611	0.0761	0.838077	242.326	8.39965	0.0702	0.868417	247.496	8.81849	0.0634	0.907376	259.345	13.0791	0.0011	2.41408	244.198	14.9628	0.0004	2.80845	277.777	16.2132	0.0001	3.13206	298.529	13.1036	0.0002	2.70364	235.971	13.8111	0.0001	2.86621	248.318	14.576	<.0001	3.03479	261.766	14.3055	<.0001	2.97794	256.923
PS	(1 vs. 0)	1.18799	0.661	0.531789	2.48949	1.19704	0.7147	0.446961	3.11244	1.21577	0.6896	0.455061	3.12983	1.18316	0.7281	0.446985	3.02108
Histology	(non-Ad vs. Ad)	2.43778	0.0171	1.17592	5.05768	1.88457	0.1793	0.748853	4.94375	1.8296	0.1844	0.748935	4.56082	1.69049	0.1987	0.758274	3.84799	1.74052	0.17	0.78732	3.89249	1.75759	0.163	0.794322	3.93011	1.63023	0.2251	0.73849	3.64083	1.69376	0.1858	0.774751	3.75406	1.68759	0.1857	0.776161	3.72138	1.78958	0.1378	0.828478	3.91771	1.70261	0.1659	0.799915	3.64513	1.55976	0.2419	0.738073	3.30987
pStage	(II/IIIA vs. I)	2.46029	0.0143	1.19868	5.16946	3.04572	0.0084	1.32773	7.28863	3.04211	0.0085	1.32622	7.28001	2.99577	0.0093	1.30709	7.23031	3.00913	0.0089	1.31373	7.25956	3.04943	0.008	1.33433	7.34182	2.91556	0.0116	1.26561	7.11081	2.8739	0.0128	1.24802	7.01947	2.43903	0.0225	1.13428	5.40147	2.44177	0.0223	1.13557	5.41185	2.26164	0.0323	1.07155	4.90229	2.33458	0.0257	1.10869	5.03977
EGFR mutation	(Wild type* vs. Mutant)	2.3973	0.0509	0.996954	7.10529	0.85852	0.8191	0.241662	3.41947
TP expression*	(<0.525 vs. ≥0.525)	0.8	0.53	0.38	1.63	0.567083	0.1896	0.240896	1.32926	0.566729	0.187	0.241595	1.32231	0.551136	0.1612	0.237469	1.27233	0.544821	0.1529	0.235236	1.25693	0.531151	0.1338	0.231227	1.21835	0.492397	0.0996	0.212419	1.14723	0.492169	0.1002	0.211873	1.14898	0.525563	0.1392	0.223693	1.23565	0.650735	0.2475	0.306742	1.34789	0.660737	0.2612	0.313247	1.36168
TS expression	(<0.766 vs. ≥0.766)	0.46	0.0365	0.21	0.95	0.628016	0.3134	0.246051	1.55038	0.632454	0.3199	0.248516	1.55866	0.653223	0.3473	0.261737	1.58697	0.672541	0.3736	0.273417	1.60859	0.654851	0.3366	0.268637	1.55041	0.749065	0.4879	0.321569	1.68869
DPD expression	(<5.825 vs. ≥5.825)	1.88	0.089	0.91	4.1	0.843909	0.7262	0.333613	2.2477	0.829075	0.6928	0.33154	2.14855
OPRT expression**	(<0.312 vs. ≥0.312)	0.83	0.61	0.4	1.7	1.34273	0.5427	0.513061	3.49811	1.37076	0.5064	0.534765	3.51475	1.309	0.5607	0.52672	3.31512	1.2507	0.614	0.521875	3.02877	1.21979	0.6509	0.513298	2.92844
ERCC1 expression	(<45.721 vs. ≥45.721)	0.61	0.18	0.28	1.25	0.647286	0.3547	0.254196	1.63198	0.657667	0.3663	0.263464	1.64233	0.638931	0.3294	0.258709	1.58193	0.664677	0.3596	0.273235	1.59612	0.662664	0.356	0.272519	1.59101	0.654628	0.3505	0.265597	1.59721	0.613954	0.2722	0.253623	1.47005	0.658522	0.3485	0.272236	1.58
EGFR expression*	(<0.735 vs. ≥0.735)	1.73	0.142	0.83	3.76	0.708476	0.4927	0.259275	1.90118	0.683962	0.4294	0.263532	1.76384	0.680588	0.4231	0.262427	1.75352	0.673662	0.409	0.260664	1.72952	0.695271	0.44	0.274122	1.76145	0.702615	0.4295	0.295217	1.70942	0.645016	0.3125	0.28016	1.53082
Arm	(A vs. B)	1.57392	0.2187	0.765398	3.3552	1.70794	0.2026	0.754117	4.113	1.71244	0.1988	0.758362	4.11373	1.73279	0.1886	0.767902	4.16057	1.66827	0.2047	0.759473	3.84448	1.70128	0.1859	0.776948	3.90449	1.61689	0.2298	0.741356	3.69597	1.56461	0.2584	0.723078	3.53809	1.46849	0.3244	0.686946	3.26989	1.46749	0.323	0.688989	3.25624
*Including a case without information; **Including two cases without information. PS, performance status; AD, adenocarcinoma; HR, hazard ratio; CI, confidential interval.
[truncated: 9 more columns]
